# Supplementary material for: Contribution of ship emissions to the concentration and deposition of air pollutants in Europe
Source: Copernicus journal article supplement (doi:10.5194/acp-16-1895-2016), 2016-02-18
Supplement: Supplementary file 1 [file acp-16-1895-2016-supplement.pdf]

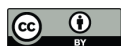

*Supplement of*

## **Contribution of ship emissions to the concentration and deposition of air pollutants in Europe**

**S. Aksoyoglu et al.**

*Correspondence to:* Sebnem Aksoyoglu (sebnem.aksoyoglu@psi.ch)

The copyright of individual parts of the supplement might differ from the CC-BY 3.0 licence.

1

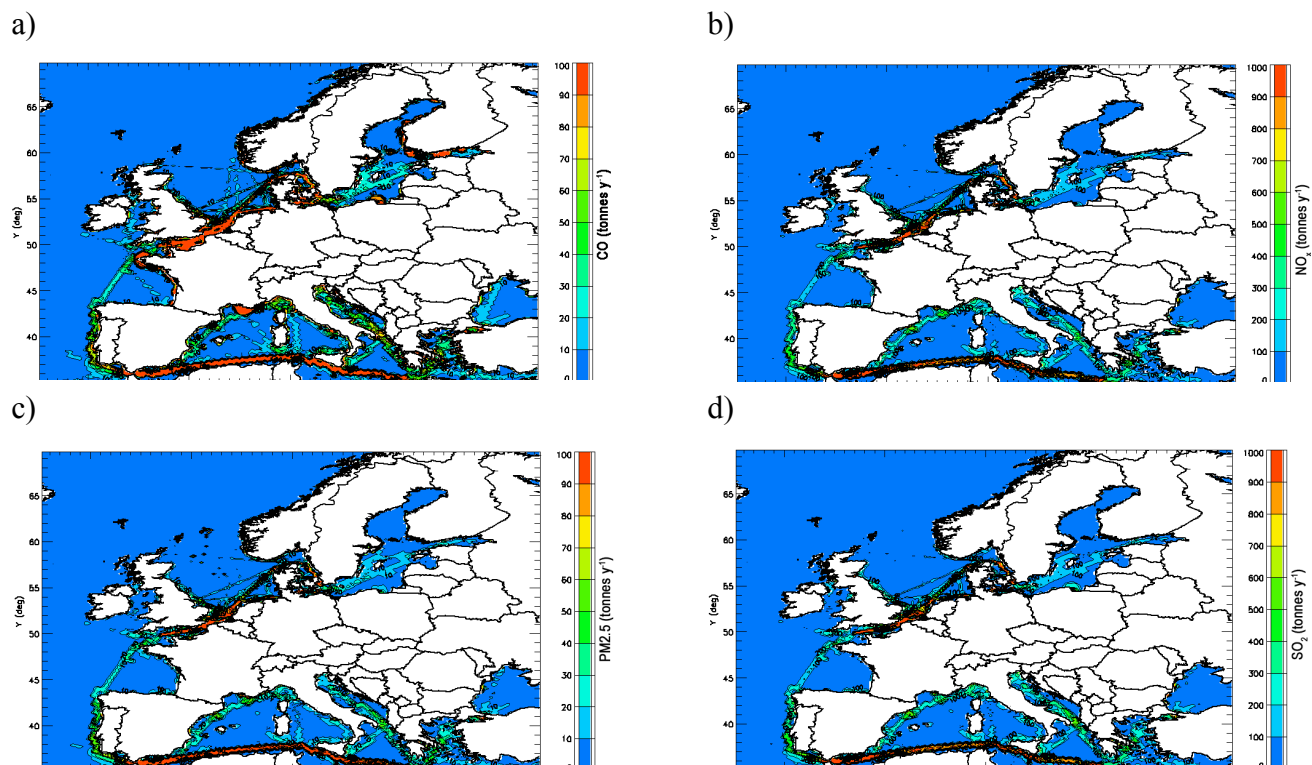

2

3 Fig. S1. Annual ship emissions in 2006 a) CO, b) NO<sub>x</sub>, c) PM<sub>2.5</sub>, d) SO<sub>2</sub> (tonnes y<sup>-1</sup>)

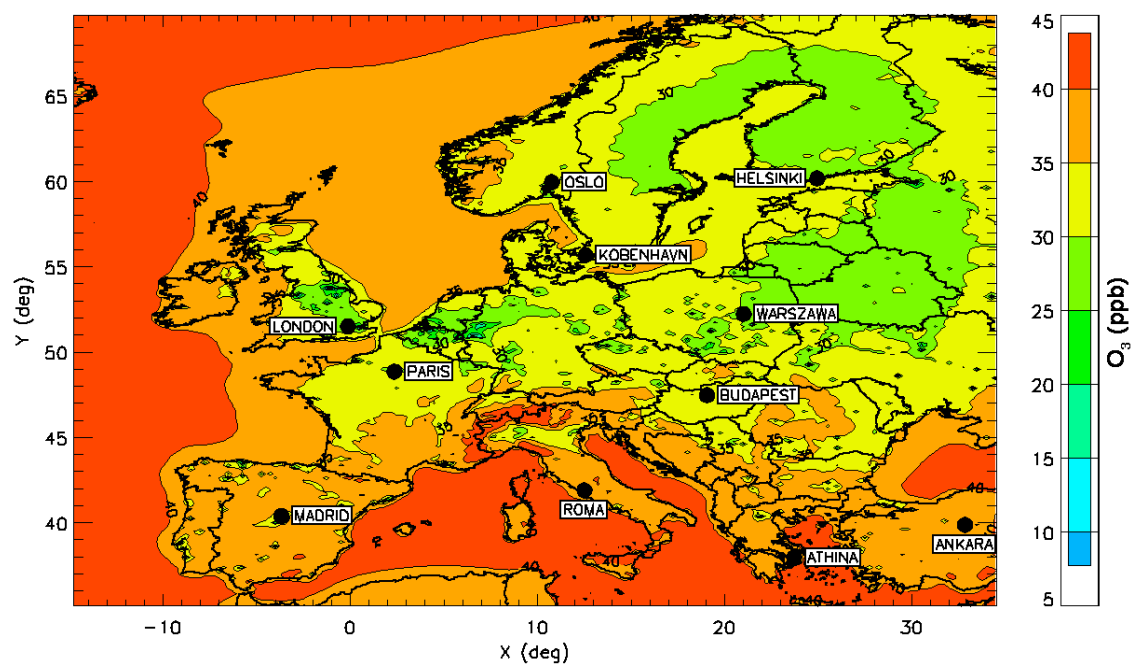

Fig. S2. Annual mean surface  $O_3$  mixing ratio (ppb) in 2006 (no ship).

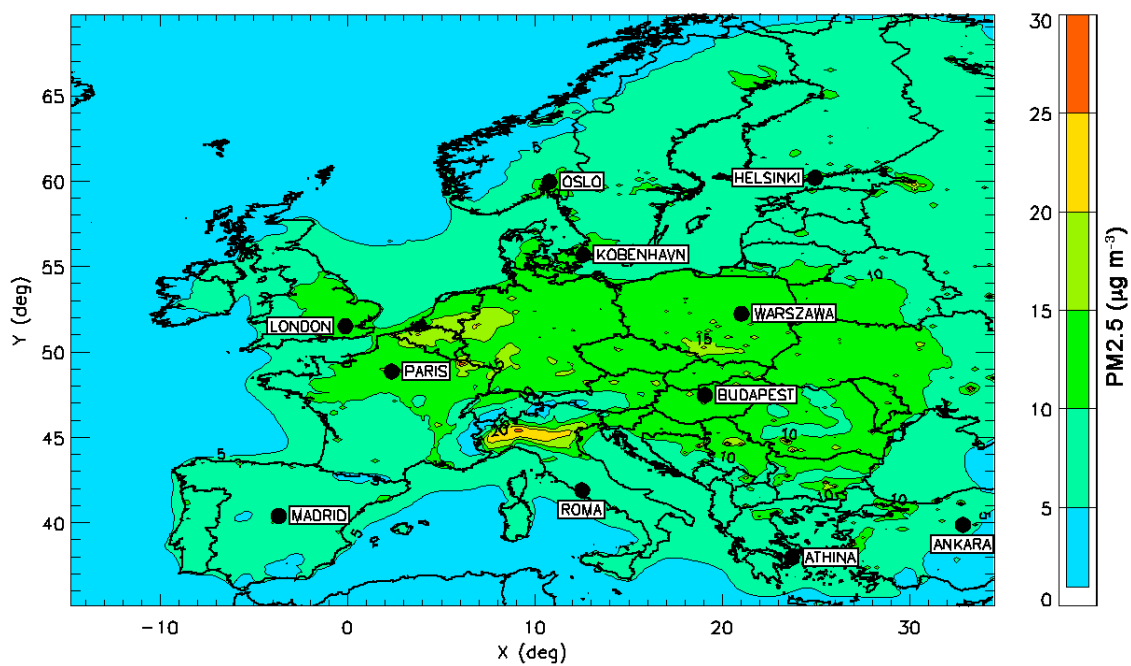

Fig. S3. Annual mean  $PM_{2.5}$  concentration ( $\mu g m^{-3}$ ) in 2006 (no ship).

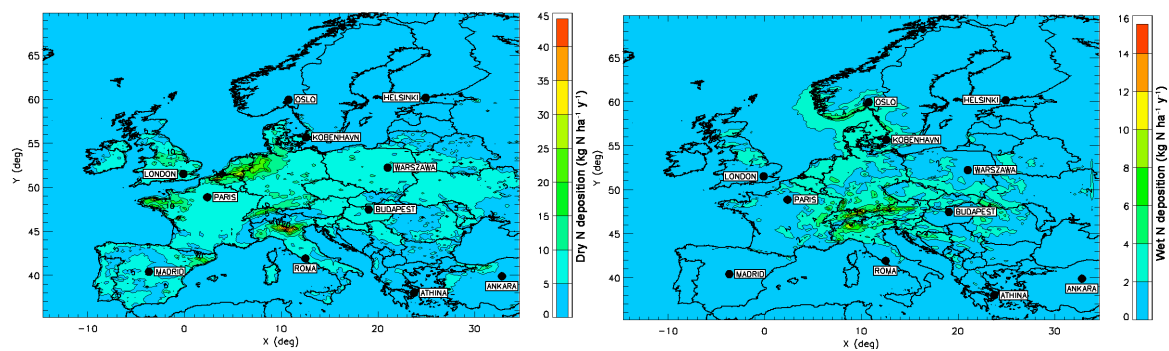

Fig. S4. Dry (left) and wet (right) nitrogen deposition ( $\text{kg N ha}^{-1} \text{y}^{-1}$ ) in 2006 (no ship).

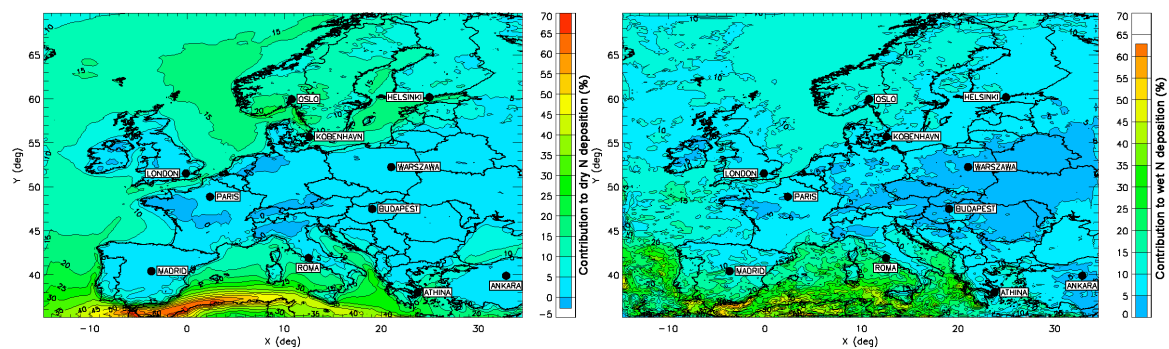

Fig. S5. Contribution of ship emissions to dry (left) and wet (right) nitrogen deposition in 2006 (%) ((base case-no ship) $\times 100$ /(base case)).

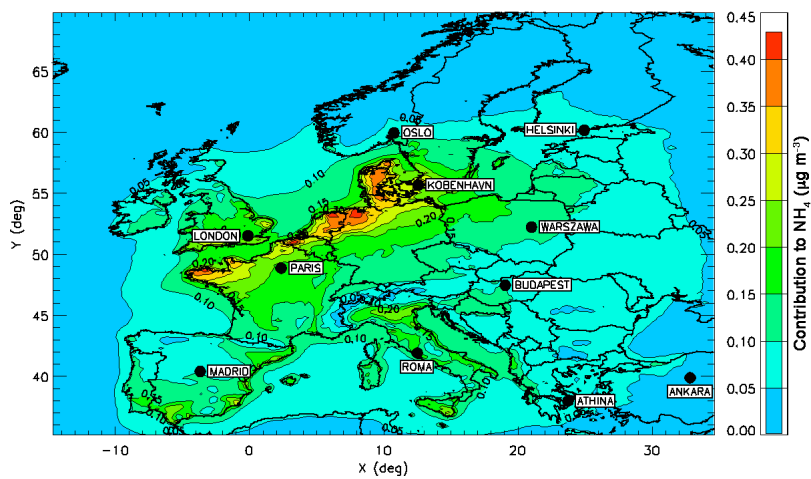

Fig. S6. Contribution of ship emissions to  $\text{NH}_4$  in 2006 ( $\mu\text{g m}^{-3}$ ) (base case-no ship).

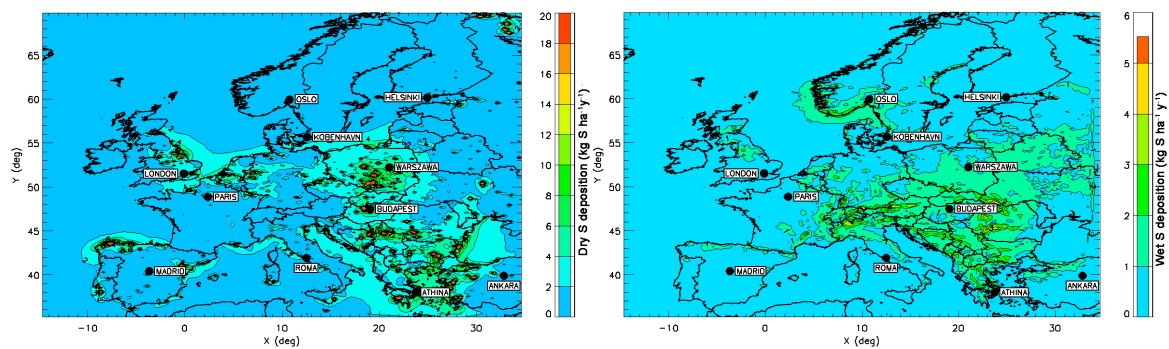

Fig. S7. Dry (left) and wet (right) S deposition ( $\text{kg S ha}^{-1} \text{y}^{-1}$ ) in 2006 (no ship). Note that the actual scale for dry deposition (left) is ten times higher.

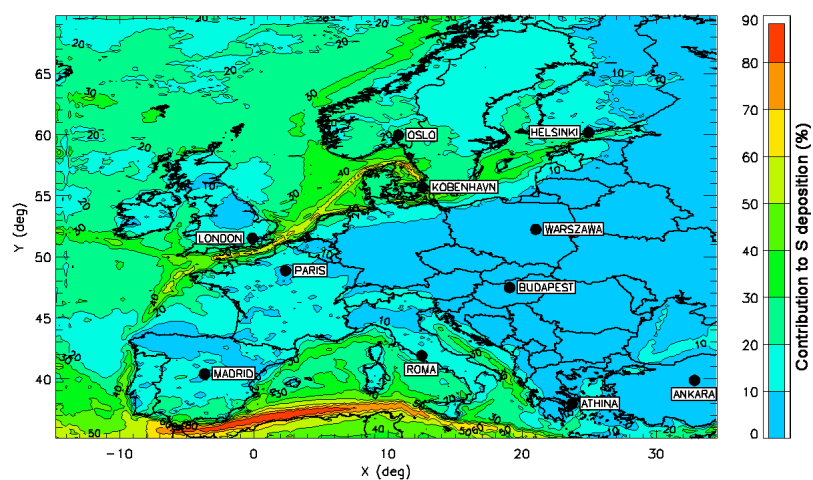

Fig. S8. Contribution of ship emissions to S deposition in 2006 (%)  $((\text{base case-no ship}) \times 100 / (\text{base case}))$ .
